# Supplementary material
Source: Springer Nature journal article supplement (https://www.springermedizin.de/resource/supplementary/12985_2012_2126_MOESM8_ESM.pdf/9606092)

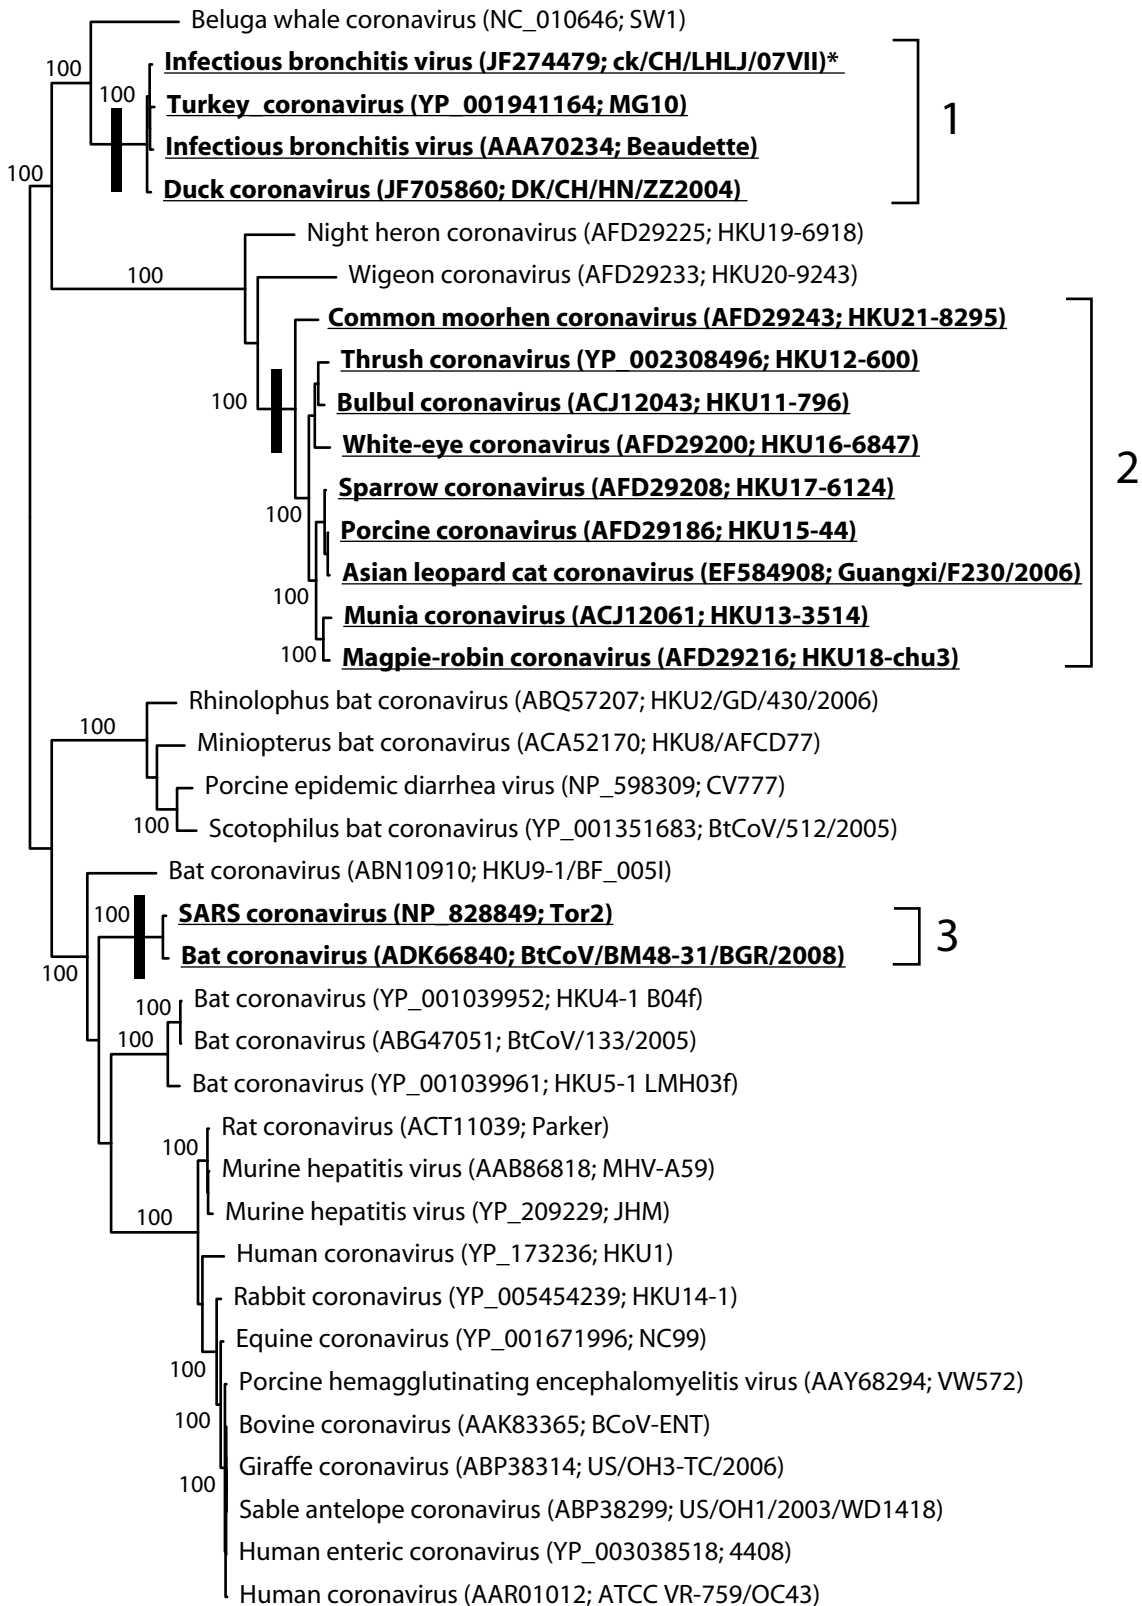

| rank | tree | obs D ln | AU        | np       | bp | pp | kh | sh | wkh | wsh | constraint | # s2m gains |
|------|------|----------|-----------|----------|----|----|----|----|-----|-----|------------|-------------|
| 1    | 1    | -750.8   | 1         | 1        | 1  | 1  | 1  | 1  | 1   | 1   | none       | 3           |
| 5    | 2    | 2696.5   | 1.00E-07  | 7.00E-07 | 0  | 0  | 0  | 0  | 0   | 0   | (1,2,3)    | 1           |
| 3    | 3    | 1473.0   | 1.00E-05  | 3.00E-06 | 0  | 0  | 0  | 0  | 0   | 0   | (1,2)      | 2           |
| 4    | 4    | 1965.7   | 1.00E-140 | 3.00E-32 | 0  | 0  | 0  | 0  | 0   | 0   | (1,3)      | 2           |
| 2    | 5    | 750.8    | 7.00E-06  | 5.00E-07 | 0  | 0  | 0  | 0  | 0   | 0   | (2,3)      | 2           |

Supplement: MOESM8 [file 9606092]
